# Supplementary material
Source: Springer Nature journal article supplement (https://www.springermedizin.de/resource/supplementary/12911_2009_332_MOESM10_ESM.pdf/9525496)
Supplement: MOESM10 [file 9525496]

patient with hypercholesterolemia  
+-- no current treatment for dyslipemia  
    +-- age  $\leq$  80  
        +-- associated risk = none : diet  
        +-- associated risk = diabetes in primary prevention : diet  
        +-- associated risk = diabetes in secondary prevention : diet+atorvastatin OR  
diet+simvastatin  
        +-- associated risk = cardiovascular : diet+atorvastatin OR diet+pravastatin OR  
diet+simvastatin OR diet+fluvastatin OR (diet+nicotinic acid OR diet+fibrate OR diet+gemfibrozil OR  
diet+ezetimib OR diet+resin)  
    +-- age > 80  
        [...]
